# Supplementary material for: Autophagy facilitates glycolysis during Ras-mediated oncogenic transformation
Source: PubMed Central journal article supplement — Mol Biol Cell. 2011 Jan 15;22(2):165–78. doi: 10.1091/mbc.E10-06-0500 (PMC3020913; doi:10.1091/mbc.e10-06-0500), 2011-01-15

**A****TRANSLATED PROTEIN****TOTAL PROTEIN**

BABE      BABE      HRasV12   HRasV12  
 WT MEF   *atg5*<sup>-/-</sup>   WT MEF   *atg5*<sup>-/-</sup>

BABE      BABE      HRasV12   HRasV12  
 WT MEF   *atg5*<sup>-/-</sup>   WT MEF   *atg5*<sup>-/-</sup>

Susp (h):   A   24   A   24   A   24   A   24

Susp (h):   A   24   A   24   A   24   A   24

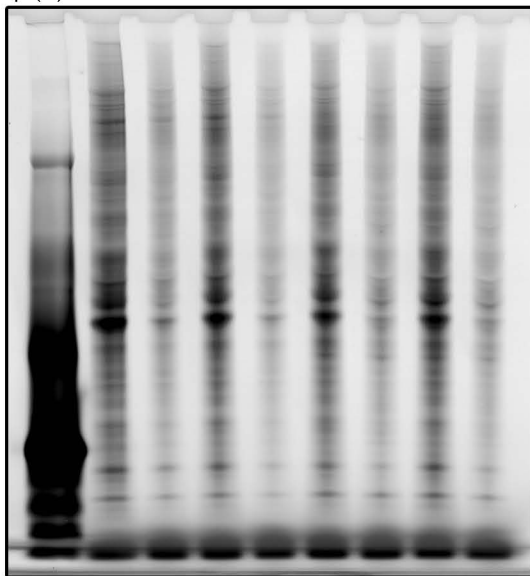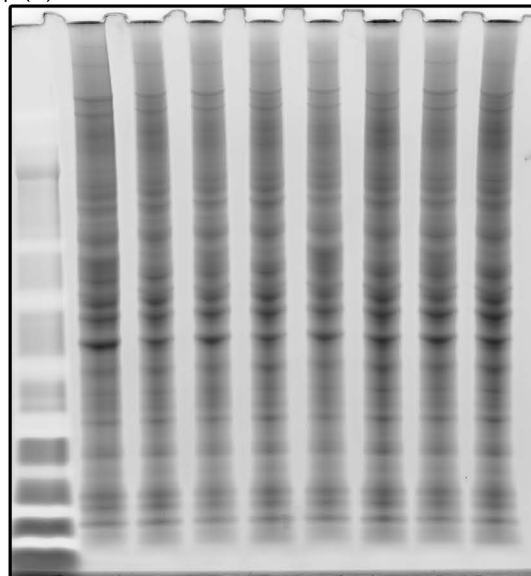**B**

|                                                 | TRANS. PROT. (AU) | % OF ATTACH. |
|-------------------------------------------------|-------------------|--------------|
| BABE WT MEF Attached                            | 903101.2          | 100.0        |
| BABE WT MEF 24hr sus                            | 251643.3          | 27.9         |
| BABE <i>atg5</i> <sup>-/-</sup> MEF Attached    | 823654.5          | 100.0        |
| BABE <i>atg5</i> <sup>-/-</sup> MEF 24hr sus    | 140428.3          | 17.0         |
| HRasV12 WT MEF Attached                         | 731482.6          | 100.0        |
| HRasV12 WT MEF 24hr sus                         | 199562.4          | 27.3         |
| HRasV12 <i>atg5</i> <sup>-/-</sup> MEF Attached | 747440.8          | 100.0        |
| HRasV12 <i>atg5</i> <sup>-/-</sup> MEF 24hr sus | 161101.4          | 21.6         |

**A****2-NBDG Uptake**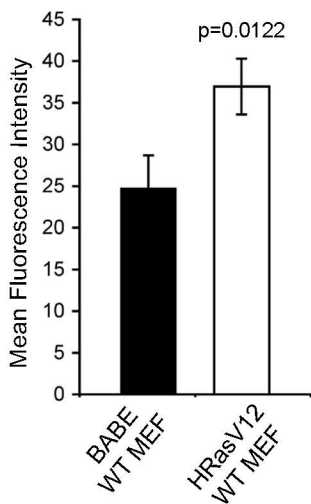**B****2-NBDG Uptake  
7h Suspension**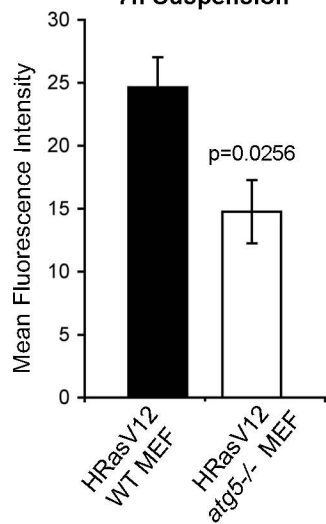**C****Intracellular [3-13C]-alanine**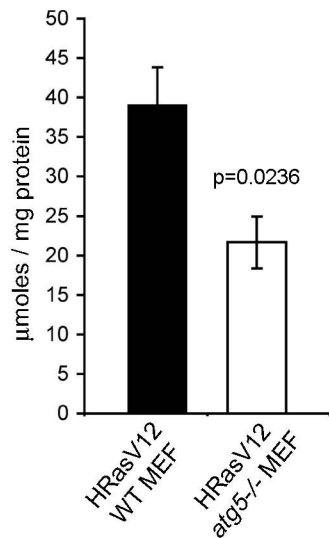**D****MDA-MB-231**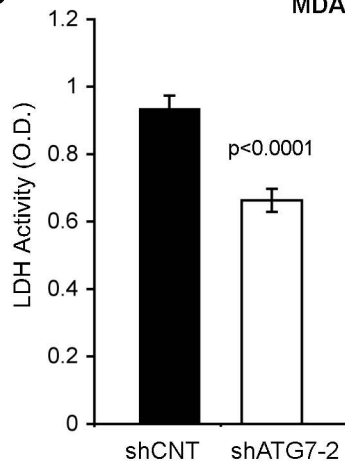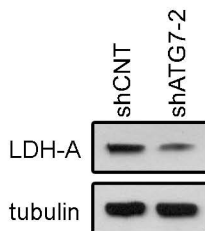**E****MEF**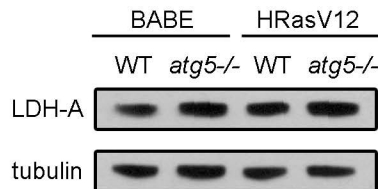

Supplement: E10-06-0500_1.pdf [file E10-06-0500_1.pdf]
